# Supplementary material for: Citrus pectin-coated inhalable PLGA nanoparticles for treatment of pulmonary fibrosis
Source: Royal Society of Chemistry journal article supplement (doi:10.1039/d4tb01682c), 2025-01-01
Supplement: d4tb01682c1.pdf [file d4tb01682c1.pdf]

***Supplementary Information for:***

**Citrus Pectin-Coated Inhalable PLGA Nanoparticles for  
Treatment of Pulmonary Fibrosis**

Kalindu Perera, Moez Ghumman Parand Sorkhdini, Carmelissa Norbrun, Seraphina Negash,  
Yang Zhou\*, Jyothi U. Menon\*

(\*Corresponding authors: jmenon@uri.edu, yang\_zhou@brown.edu)

**Table S1** Primer sequences used for RT-PCR.

| <b>Experiments</b>         | <b>Gene</b> | <b>Primers</b>                                        |
|----------------------------|-------------|-------------------------------------------------------|
| <i>In vitro</i><br>(human) | COL1A1      | F: GAGGGCCAAGACGAAGACATC<br>R: CAGATCACGTCATCGCACAAC  |
|                            | COL3A1      | F: CCACTTGGGATTGCTGGGAT<br>R: GGACCACGTTCTCCACTGAG    |
|                            | FN1         | F: CGGTGGCTGTCAGTCAAAG<br>R: AAACCTCGGCTTCCTCCATAA    |
| <i>In vivo</i><br>(mouse)  | ACTA2       | F: GTCCCAGACATCAGGGAGTAA<br>R: TCGGATACTTCAGCGTCAGGA  |
|                            | COL1A1      | F: GCTCCTCTTAGGGGCCACT<br>R: CCACGTCTCACCATTGGGG      |
|                            | FN1         | F: ATGTGGACCCCTCCTGATAGT<br>R: GCCCAGTGATTTCAAGCAAAGG |
|                            | LGALS3      | F: AGACAGCTTTTCGCTTAACGA<br>R: GGGTAGGCACTAGGAGGAGC   |

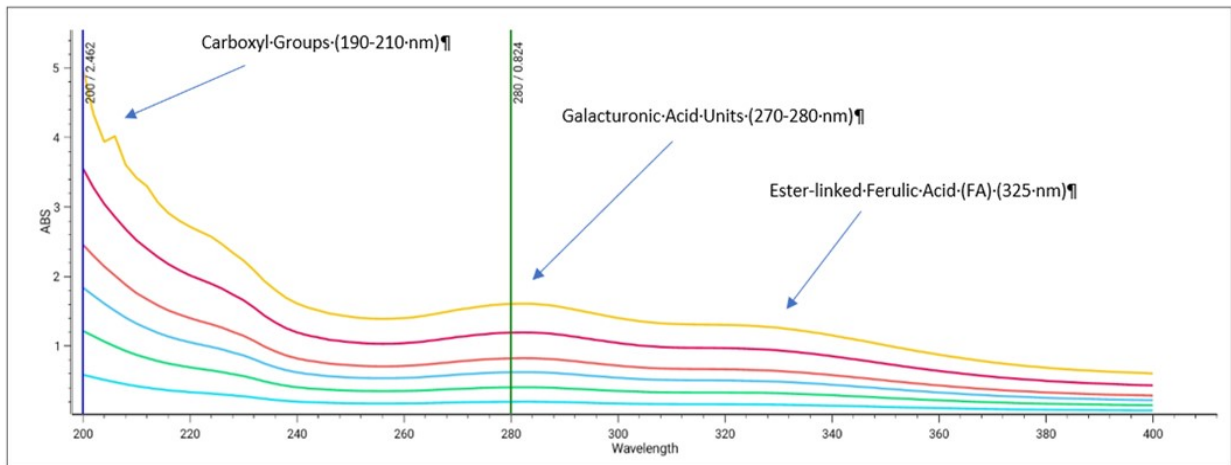

**Fig. S1** Graph of UV-Vis spectrophotometric spectral wavelength scan of citrus pectin at 0.25- (light blue), 0.5- (green), 0.75- (blue), 1 (orange), 1.5- (purple), and 2 mg/mL (yellow) concentrations (ascending spectra) from  $\lambda = 200$ -400 nm.

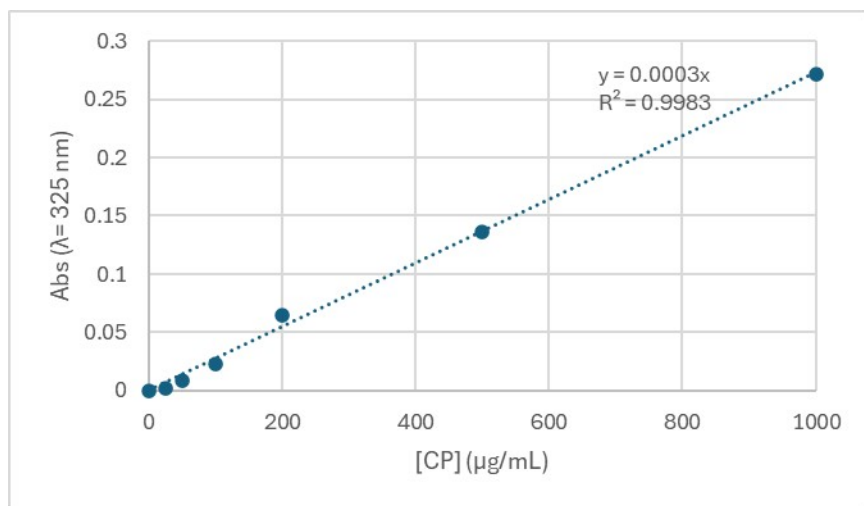

**Fig. S2** Calibration plot used for quantification of CP in CP-PLGA NPs, using wavelength identified from S1 above.

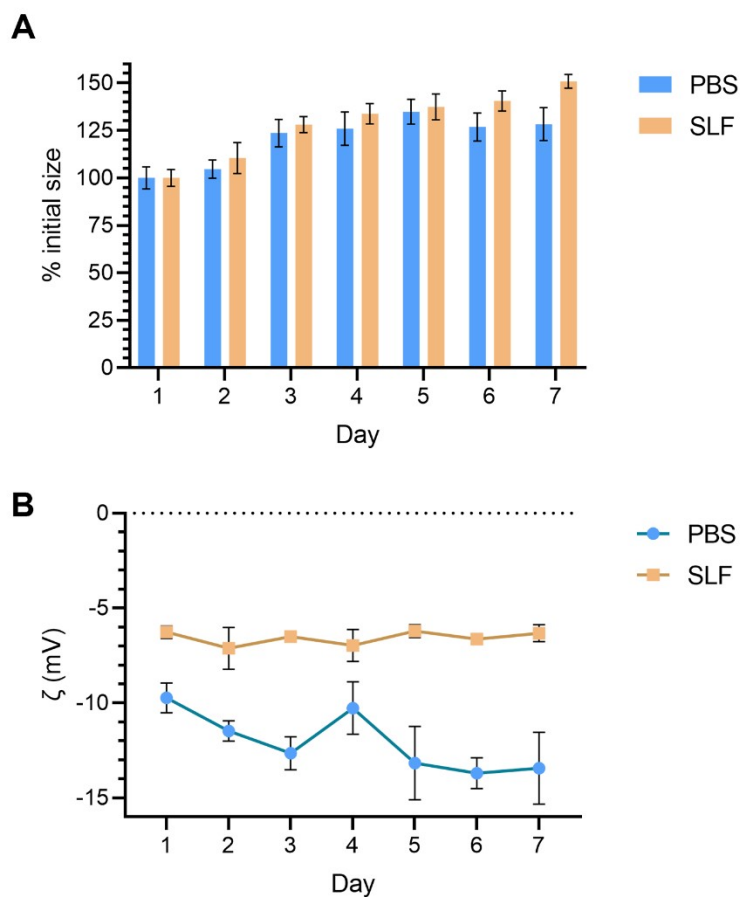

**Fig. S3** Results of nanoparticle stability assessment in phosphate buffered saline (PBS; pH 7.4) and simulated lung fluid (SLF), with respect to **A**) size and **B**) zeta potential ( $\zeta$ ). Some swelling of the CP-PLGA NPs was observed over 7 days in both media, while zeta potential tended to remain stable in SLF or get stronger in PBS over the same period.

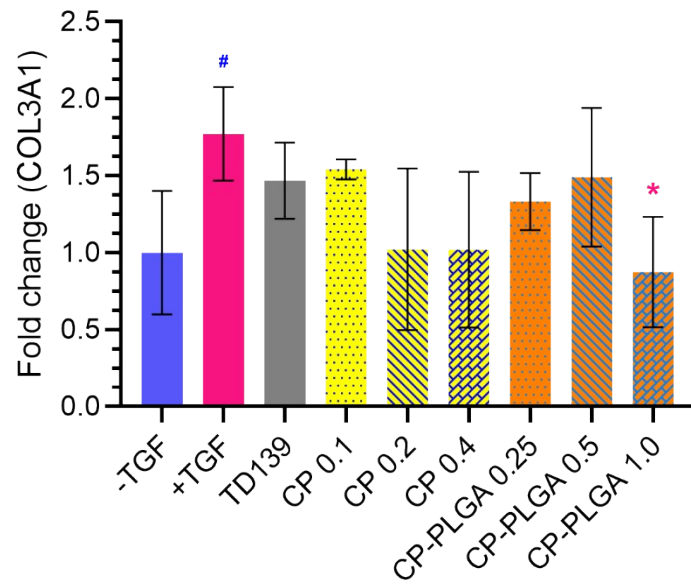

**Fig. S4** Results of RT-PCR quantification of COL3A1 in MRC-5 cells subjected to treatment as in Fig. 6 in main text. Statistically significant downregulation of COL3A1 compared to the +TGF-only group was observed at only 1.0 mg/mL CP-PLGA (indicated by red asterisk). (\*/#  $P \leq 0.05$ ;  $n=3$ ).
